# Supplementary material
Source: PubMed Central journal article supplement (PMC6028973)
Supplement: supp_RA118.001774_135110_2_supp_121427_p7bnw5.pdf [file supp_RA118.001774_135110_2_supp_121427_p7bnw5.pdf]

## Supporting Information

*Nicotiana benthamiana*  $\alpha$ -galactosidase A1.1 can functionally complement human  $\alpha$ -galactosidase A deficiency associated with Fabry disease

**Kassiani Kytidou<sup>1</sup>, Jules Beekwilder<sup>2</sup>, Marta Artola<sup>3</sup>, Eline van Meel<sup>1</sup>, Ruud H.P. Wilbers<sup>2</sup>, Geri F. Moolenaar<sup>4</sup>, Nora Goosen<sup>4</sup>, Maria J. Ferraz<sup>1</sup>, Rebecca Katzy<sup>1</sup>, Patrick Voskamp<sup>5</sup>, Bogdan I. Florea<sup>3</sup>, Cornelis H. Hokke<sup>6</sup>, Herman S. Overkleeft<sup>3</sup>, Arjen Schots<sup>2</sup>, Dirk Bosch<sup>2</sup>, Navraj Pannu<sup>5</sup>, Johannes M.F.G. Aerts<sup>1</sup>.**

1. Department of Medical Biochemistry, Leiden Institute of Chemistry, Einsteinweg 55, 2333 CC Leiden, The Netherlands

2. Wageningen University and Research, Plant Sciences Group, Droevendaalsesteeg 1, 6708 PB Wageningen, The Netherlands

3. Department of Bio-organic Synthesis, Leiden Institute of Chemistry, Einsteinweg 55, 2333 CC Leiden, The Netherlands

4. Cloning and Protein Purification Facility of Leiden Institute of Chemistry, Einsteinweg 55, 2333CC Leiden, The Netherlands

5. Department of Biophysical Structural Chemistry, Leiden Institute of Chemistry, Einsteinweg 55, 2333 CC Leiden, The Netherlands

6. Department of Parasitology, Centre of Infectious Diseases, Leiden University Medical Center, Albinusdreef 2, 2333 ZA Leiden, The Netherlands

Running title: *A plant  $\alpha$ -Galactosidase showing great similarity to human enzyme.*

\* Corresponding author: j.m.f.g.aerts@lic.leidenuniv.nl

**Key words:**  $\alpha$ -galactosidase, *Nicotiana benthamiana*, homologue, Fabry disease, lysosomal storage disorder, recombinant enzyme, enzyme replacement therapy, glycosphingolipid

### Scheme S1. Synthesis of ME741 (Biotinylated $\alpha$ -Galactosidase ABP)

$\alpha$ -Galactose configured biotinylated cyclophellitol aziridine ME741 was synthesized by copper-catalyzed click chemistry of azido cyclophellitol aziridine intermediate with biotin alkyne (Figure S1).

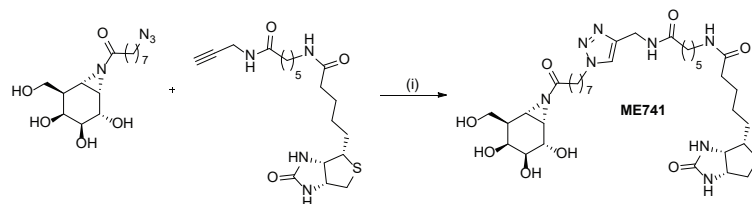

### Scheme S1. Synthesis of biotinylated $\alpha$ -Galactosidase ABP ME741. Reagents and conditions:

(i)  $\text{CuSO}_4 \cdot \text{H}_2\text{O}$ , sodium ascorbate, DMF, rt, 18 h, 26%.

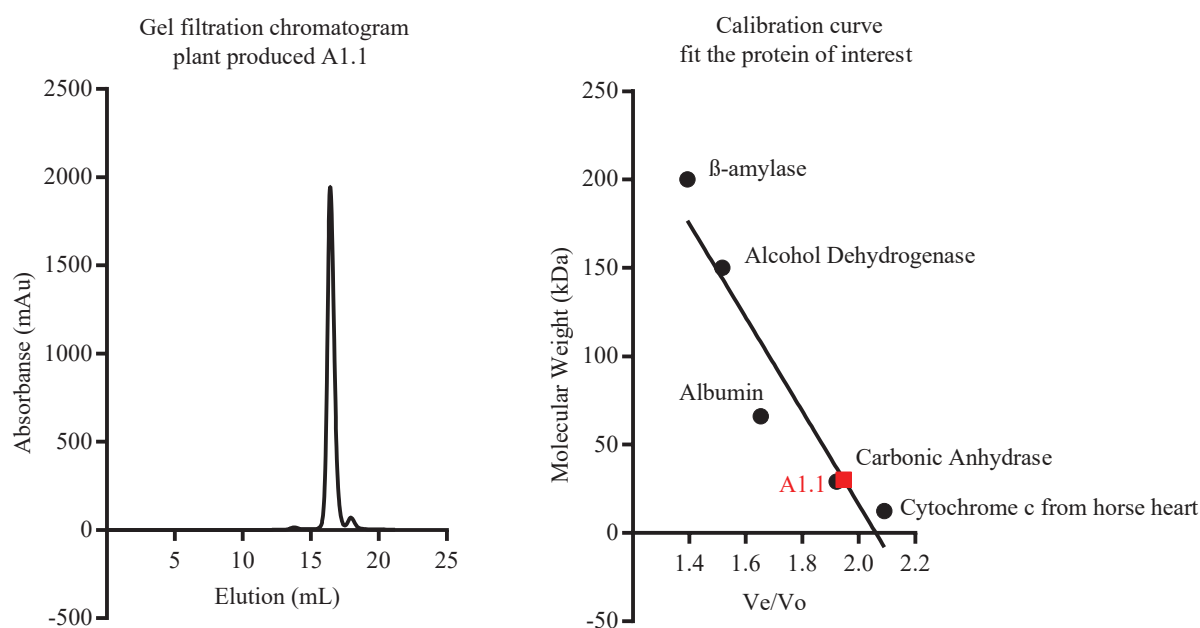

**Figure S1. Analytical gel filtration chromatography analysis of A1.1.** Left panel. Gel filtration chromatogram of the *N.benthamiana* produced A1.1, after its application in Superdex™ 200 Increase 10/300 GL. Right panel. Gel filtration chromatography calibration curve of proteins with known molecular weight, fitting the results of the plant produced A1.1. In black circle,  $\beta$ -amylase, alcohol dehydrogenase, albumin, carbonic anhydrase, cytochrome c from horse heart and Dextran. In red box A1.1.

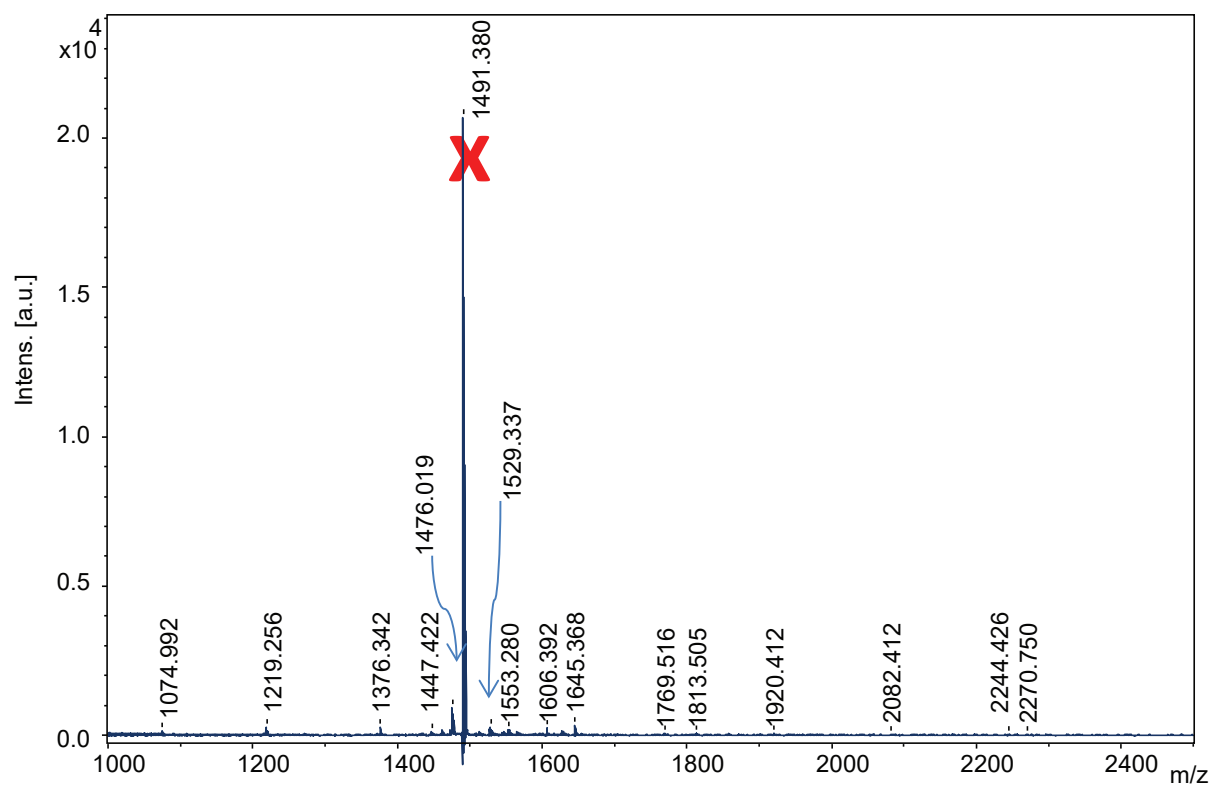

**Figure S2. Determination of A1.1 N-glycosylation profile.** MALDI-TOF MS analysis of 2-aminobenzoic acid derivatised PNGase-A possibly released N-glycans of plant produced A1.1. No N-linked glycans were detected.

(A)

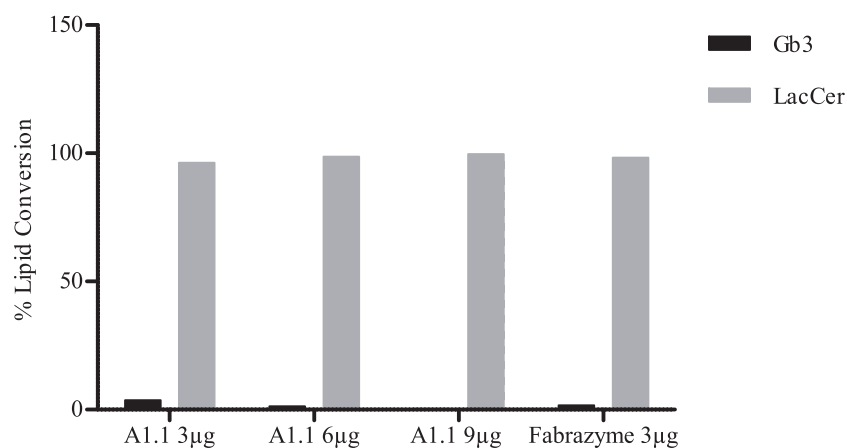

(B)

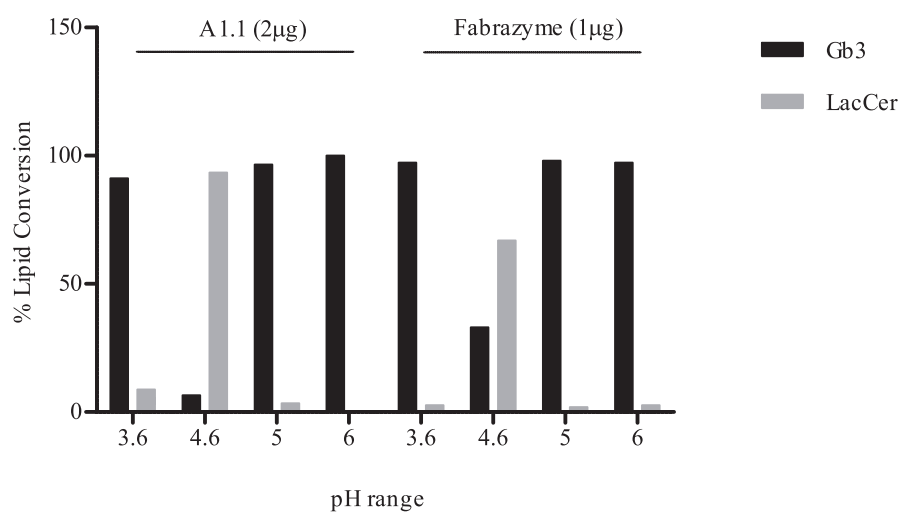

**Figure S3. Activity of A1.1 and Fabrazyme towards lipid substrates, as measured by HPLC analysis.** (A) HPLC analysis of degradation of C18-Gb3 to LacCer by different μg amounts of A1.1 or Fabrazyme. (B) Degradation of C18-Gb3 to LacCer by A1.1 or Fabrazyme in different pHs (3.6-6).

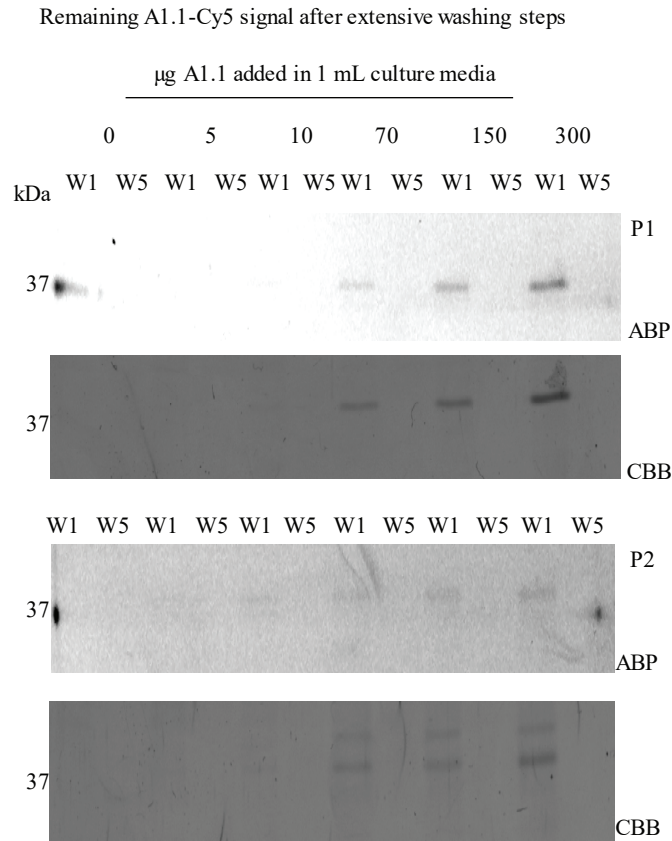

**Figure S4. Detection of remaining Cy5 signal after exposure of FD fibroblasts to prelabelled A1.1, from Figure 6.** After incubation of the 2 different FD fibroblasts, with prelabelled A1.1, extensive washing steps (x5) of the cells performed. To ensure that all of the not internalized to the cells prelabelled protein is washed out prior to lysate making, samples from both wash 1 and wash 5 (W1 and W5) were analysed in SDS-PAGE, following the fluorescent signal. 10 % of the total wash volume was loaded on the gels. ABP= activity based probe, CBB= Coomassie brilliant blue, P1= patient 1, P2= patient 2.

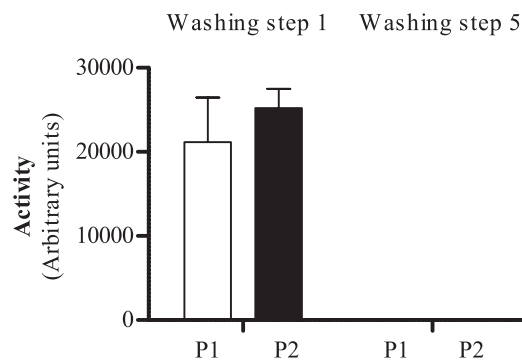

**Figure S5. 4MU-α-GAL activities found in washing steps of Figure 7.** After treatment with 300 µg/mL of A1.1, the FD cells were extensively washed with PBS (x5 times). Activities in washing steps 1 and 5 were performed to ensure that no remaining activity is found to the cells prior to lysate making. P1= patient 1, P2= patient 2.

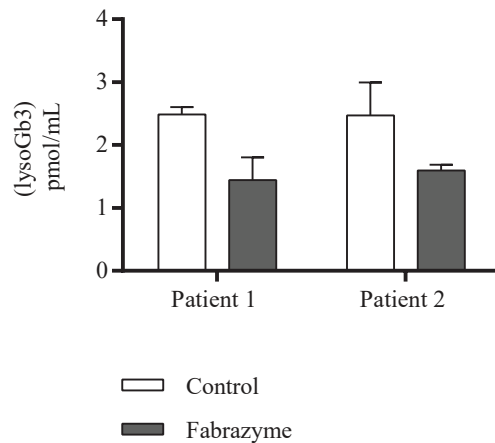

**Figure S6. LC-MS/MS analysis of lysoGb3 found in FD fibroblasts after incubation with Fabrazyme.** Fibroblasts from FD patients were grown in 12 well plates. Overnight incubation with 5  $\mu$ g/mL of Fabrazyme took place, followed by lipid extraction and LC-MS/MS analysis.  $^{13}\text{C}$ lysoGb3 was used as internal standard. (n=2, error bars indicate mean  $\pm$  standard deviation).

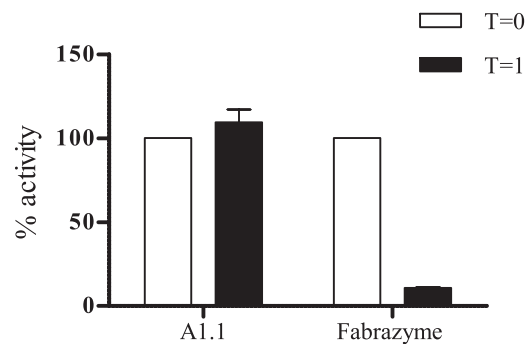

**Figure S7. 4MU- $\alpha$ -Gal activity of recombinant galactosidases after incubation in FD serum, before and after ERT.** A1.1 and Fabrazyme were incubated in Fabry serum at a concentration of 1 mg/mL each, before and after ERT (T=0, T=1, respectively). (n=2, error bars indicate mean  $\pm$  standard deviation).

Table S1. Proteomics analysis using Swissprot (version June 2017)

|             | Sample      | Protein<br>Accession code | Protein<br>Name              | Organism                    | Coverage<br>% AA | ppm                  | Score                | Sequence                                       |
|-------------|-------------|---------------------------|------------------------------|-----------------------------|------------------|----------------------|----------------------|------------------------------------------------|
| Apoplast #1 | DMSO        |                           |                              |                             |                  |                      |                      |                                                |
|             | Competition | Q8RX86                    | $\alpha$ -galactosidase<br>2 | <i>Arabidopsis thaliana</i> | 2                | -4                   | 28                   | EVIAVNQDK                                      |
|             | Pull down   | Q8RX86                    | $\alpha$ -galactosidase<br>2 | <i>Arabidopsis thaliana</i> | 2                | -7                   | 56                   | EVIAVNQDK                                      |
|             |             | Q42656                    | $\alpha$ -galactosidase      | <i>Coffea arabica</i>       | 4                | -5<br>-4             | 29<br>13             | GSTFSPGIK<br>ALADYVHSK                         |
|             |             | Q9FT97                    | $\alpha$ -galactosidase<br>1 | <i>Arabidopsis thaliana</i> | 3                | -4<br>-12            | 23<br>35             | STFSPGIK<br>YPVMTR                             |
| Apoplast #2 | DMSO        |                           |                              |                             |                  |                      |                      |                                                |
|             | Competition | Q8RX86                    | $\alpha$ -galactosidase<br>2 | <i>Arabidopsis thaliana</i> | 2                | -8                   | 54                   | EVIAVNQDK                                      |
|             | Pull down   | Q42656                    | $\alpha$ -galactosidase      | <i>Coffea arabica</i>       | 8                | -6<br>-8<br>-8<br>-7 | 38<br>22<br>30<br>52 | GSTFSPGIK<br>ALADYVHSK<br>YPIMSK<br>APLLIGCDIR |
|             |             | Q8RX86                    | $\alpha$ -galactosidase<br>2 | <i>Arabidopsis thaliana</i> | 2                | 8                    | 56                   | EVIAVNQDK                                      |
|             |             | Q9FT97                    | $\alpha$ -galactosidase<br>1 | <i>Arabidopsis thaliana</i> | 7                | -7<br>5<br>-8        | 10<br>31<br>29       | STFSPGIK<br>LGIYSDAGYFTCSK<br>YPVMTR           |

Table S2. Proteomics analysis using Swissprot (version June 2017, including N.benthamiana  $\alpha$ -galactosidase sequence).

|                      | Sample      | Coverage<br>(% of AA) | Start-End                                                                                                                                                             | ppm                                                                      | Score                                                                      | Sequence                                                                                                                                                                                | AA identified |
|----------------------|-------------|-----------------------|-----------------------------------------------------------------------------------------------------------------------------------------------------------------------|--------------------------------------------------------------------------|----------------------------------------------------------------------------|-----------------------------------------------------------------------------------------------------------------------------------------------------------------------------------------|---------------|
| Plant leaf lysate #1 | DMSO        | 0                     |                                                                                                                                                                       |                                                                          |                                                                            |                                                                                                                                                                                         |               |
|                      | Competition | 0                     |                                                                                                                                                                       |                                                                          |                                                                            |                                                                                                                                                                                         |               |
|                      | Pull down   | 7                     | 139 - 152<br>213 - 245                                                                                                                                                | 4<br>6                                                                   | 39<br>17                                                                   | LGIYSDAGSQTCSK<br>TTGDISDNWDSMTSR                                                                                                                                                       | 29            |
| Apoplast #1          | DMSO        | 0                     |                                                                                                                                                                       |                                                                          |                                                                            |                                                                                                                                                                                         |               |
|                      | Competition | 0                     |                                                                                                                                                                       |                                                                          |                                                                            |                                                                                                                                                                                         |               |
|                      | Pull down   | 17                    | 118 - 126<br>127 - 135<br>139 - 152<br>153 - 166<br>231 - 245<br>314 - 322                                                                                            | -5<br>-4<br>1<br>-7<br>8<br>-7                                           | 29<br>13<br>82<br>42<br>22<br>56                                           | GSTFSPGIK<br>ALADYVHSK<br>LGIYSDAGSQTCSK<br>QMTGSLGHEEQDAK<br>TTGDISDNWDSMTSR<br>EVIAVNQDK                                                                                              | 70            |
|                      | DMSO        | 0                     |                                                                                                                                                                       |                                                                          |                                                                            |                                                                                                                                                                                         |               |
|                      | Competition | 11                    | 118 - 126<br>139 - 152<br>153 - 166<br>314 - 322                                                                                                                      | -8<br>2<br>-6<br>-8                                                      | 20<br>45<br>57<br>54                                                       | GSTFSPGIK<br>LGIYSDAGSQTCSK<br>QMTGSLGHEEQDAK<br>EVIAVNQDK                                                                                                                              | 46            |
| Apoplast #2          | Pull down   | 33                    | 118 - 126<br>127 - 135<br>139 - 152<br>153 - 166<br>192 - 197<br>231 - 245<br>291 - 300<br>301 - 313<br>314 - 322<br>348 - 355<br>381 - 388<br>393 - 405<br>406 - 412 | -6<br>-8<br>1<br>2<br>-8<br>4<br>-7<br>-12<br>8<br>-9<br>-5<br>-9<br>-13 | 38<br>22<br>48<br>34<br>30<br>80<br>52<br>40<br>56<br>10<br>34<br>12<br>33 | GSTFSPGIK<br>ALADYVHSK<br>LGIYSDAGSQTCSK<br>QMTGSLGHEEQDAK<br>YPIMSK<br>TTGDISDNWDSMTSR<br>APLIIGCDLR<br>SMDQTAHEILSNK<br>EVIAVNQDK<br>VALVLWNR<br>DLWAHSTK<br>GQISASIDSHDCR<br>MYVLTPK | 135           |
